# Supplementary material for: Unraveling the climate neutrality of wood derivatives and biopolymers
Source: Royal Society of Chemistry journal article supplement (doi:10.1039/d4su00010b), 2024-01-01
Supplement: d4su00010b1.pdf [file d4su00010b1.pdf]

# Supplementary Information to "Unraveling the Climate Neutrality of Wood Derivatives and Biopolymers"

Akshat Sudheshwar<sup>1</sup>, Kealie Vogel<sup>1,2</sup>, Gustav Nyström<sup>2</sup>, Nadia Malinverno<sup>1</sup>, Monica Arnaudo<sup>1</sup>, Carlos E. Gomez-Camacho<sup>1</sup>, Didier Beloin-St-Pierre<sup>1</sup>, Roland Hirschier<sup>1</sup>, and Claudia Som<sup>1\*</sup>

<sup>1</sup>Empa—Swiss Federal Laboratories for Material Science and Technology, Technology and Society Laboratory, Lerchenfeldstrasse 5, 9014 St. Gallen, Switzerland

<sup>2</sup>Empa—Swiss Federal Laboratories for Material Science and Technology, Cellulose and Wood Materials Laboratory, Überlandstrasse 129, 8600 Dübendorf, Switzerland

\*Corresponding Author

E-mail address: [Claudia.Som@empa.ch](mailto:Claudia.Som@empa.ch)

## Table of Contents

|                                                                                                                                     |           |
|-------------------------------------------------------------------------------------------------------------------------------------|-----------|
| <b>Chapter 1: Data Collection and Selection</b> .....                                                                               | <b>2</b>  |
| Supplementary Table 1. Literature reviewed on the climate change impacts of the production of wood derivatives. ....                | 2         |
| Supplementary Figure 1. Compiled data points on the climate change impacts of the production of wood derivatives.....               | 8         |
| <b>Chapter 2: Carbon Dioxide Uptake Calculations for Bio-based Materials</b> .....                                                  | <b>9</b>  |
| Supplementary Table 2. Calculated carbon dioxide uptake and release amounts for 1 kg of lignin, CNF, and PLA. ....                  | 9         |
| <b>Chapter 3: Discounting Rate</b> .....                                                                                            | <b>9</b>  |
| Supplementary Figure 2. An illustration of dynamic carbon accounting involving an annual discount rate of 1%.....                   | 9         |
| <b>Chapter 4: End-of-Life Options</b> .....                                                                                         | <b>9</b>  |
| Supplementary Figure 3. End of life scenarios analyzed for the bio-based materials. ....                                            | 10        |
| Supplementary Figure 4. End of life scenarios analyzed for the petroleum-based plastic polymers. ....                               | 11        |
| <b>Chapter 5: Life Cycle Climate Change Impacts of Materials</b> .....                                                              | <b>11</b> |
| Supplementary Table 3. Total lifecycle climate change impacts for each material in each scenario (in kg CO <sub>2</sub> eq. /kg). . | 11        |
| <b>Chapter 6: References</b> .....                                                                                                  | <b>14</b> |

## Chapter 1: Data Collection and Selection

Data on the climate change impacts from the production of the wood derivatives cellulose, hemicellulose, lignin, cellulose nanofibril (CNF), and cellulose nanocrystal (CNC) were gathered from the literature and assessed for inclusion or exclusion in the lifecycle scenarios modeled for the paper. Data points were excluded on the basis of 1) unusually high values stemming from lab-scale production processes, 2) unusually high values stemming from the utilization of waste or agricultural biomass as input, or 3) any value that already incorporated any form of carbon crediting, since carbon crediting would be performed later manually.

All data points gathered regarding the climate change impacts from the production of the selected wood derivatives (cellulose, hemicellulose, lignin, microfibrillated cellulose, and cellulose nanocrystals) that were taken from the literature in [Supplementary Table 1](#) were then graphically plotted in [Supplementary Figure 1](#) to visualize the data and identify extreme outliers.

**Supplementary Table 1. The literature reviewed on the climate change impacts of the production of wood derivatives. All the environmental impacts tabulated below have been plotted in Supplementary Figure 1. Data points may be included or rejected for only lignin and CNF; for all other wood derivatives not considered in the assessment, inclusion or rejection is not applicable (N.A.). The extended table can be found in Supplementary\_Table.xlsx**

| Reference | Feedstock                                | Feedstock Type    | Process            | Wood Derivative | Environmental Impact (kg CO <sub>2</sub> eq. per 1kg of derivative) | Included or Rejected | Notes or Reasoning for Rejection   |
|-----------|------------------------------------------|-------------------|--------------------|-----------------|---------------------------------------------------------------------|----------------------|------------------------------------|
| <b>1</b>  | Eucalyptus Wood                          | Primary Wood      | Viscose Process    | Cellulose       | 3.8                                                                 | N.A.                 | CO <sub>2</sub> uptake considered; |
|           | Eucalyptus Wood                          | Primary Wood      | Viscose Process    | Cellulose       | 5.3                                                                 | N.A.                 |                                    |
|           | Eucalyptus and Beech Wood                | Primary Wood      | Lyocell Process    | Cellulose       | 1.1                                                                 | N.A.                 | CO <sub>2</sub> uptake considered  |
|           | Eucalyptus and Beech Wood                | Primary Wood      | Lyocell Process    | Cellulose       | 2.5                                                                 | N.A.                 |                                    |
|           | Eucalyptus and Beech Wood                | Primary Wood      | Lyocell Process    | Cellulose       | 0.05                                                                | N.A.                 | CO <sub>2</sub> uptake considered  |
|           | Eucalyptus and Beech Wood                | Primary Wood      | Lyocell Process    | Cellulose       | 1.5                                                                 | N.A.                 |                                    |
|           | European Beech Wood                      | Primary Wood      | Viscose Process    | Cellulose       | 0.03                                                                | N.A.                 | CO <sub>2</sub> uptake considered  |
|           | European Beech Wood                      | Primary Wood      | Viscose Process    | Cellulose       | 1.5                                                                 | N.A.                 |                                    |
|           | European Beech Wood                      | Primary Wood      | Viscose Process    | Cellulose       | -0.25                                                               | N.A.                 | CO <sub>2</sub> uptake considered  |
|           | European Beech Wood                      | Primary Wood      | Viscose Process    | Cellulose       | 1.2                                                                 | N.A.                 |                                    |
| <b>2</b>  | Norwegian Spruce                         | Primary Wood      | Borregaard         | Cellulose       | 1.160                                                               | N.A.                 |                                    |
|           | Norwegian Spruce                         | Primary Wood      | Borregaard         | Lignin          | 0.666                                                               | Included             |                                    |
|           | Norwegian Spruce                         | Primary Wood      | Borregaard         | Lignin          | 1.12                                                                | Included             |                                    |
| <b>3</b>  | Eucalyptus Wood - Bleached Sulphate Pulp | Primary Wood Pulp | Kraft wood pulping | Cellulose       | 2                                                                   | N.A.                 |                                    |

| Reference | Feedstock                | Feedstock Type | Process                                                                          | Wood Derivative | Environmental Impact (kg CO <sub>2</sub> eq. per 1kg of derivative) | Included or Rejected | Notes or Reasoning for Rejection                                 |
|-----------|--------------------------|----------------|----------------------------------------------------------------------------------|-----------------|---------------------------------------------------------------------|----------------------|------------------------------------------------------------------|
|           | Eucalyptus Wood          | Primary Wood   | Refining                                                                         | CNF             | 7                                                                   | Rejected             | Lab-scale process                                                |
|           | Eucalyptus Wood          | Primary Wood   | Refining and homogenization                                                      | CNF             | 12.5                                                                | Rejected             | Lab-scale process                                                |
| 4         | Mixed Hardwood Woodchips | Primary Wood   | Extraction and concentration of hemicellulose to 70% dry content via evaporation | Hemicellulose   | 0.0298                                                              | N.A.                 |                                                                  |
|           | Mixed Hardwood Woodchips | Primary Wood   | Extraction and concentration of hemicellulose to 50% dry content via evaporation | Hemicellulose   | 0.0332                                                              | N.A.                 |                                                                  |
| 5         | Sugarcane Bagasse Pith   | Agro Waste     | Ultrasound-assisted alkaline extraction                                          | Hemicellulose   | 277                                                                 | N.A.                 | Agricultural feedstock; lab-scale process; impact unusually high |
|           | Sugarcane Bagasse Pith   | Agro Waste     | Ultrasound-assisted alkaline extraction                                          | Hemicellulose   | 306                                                                 | N.A.                 | Agricultural feedstock; lab-scale process; impact unusually high |
|           | Sugarcane Bagasse Pith   | Agro Waste     | Ultrasound-assisted alkaline extraction                                          | Hemicellulose   | 267                                                                 | N.A.                 | Agricultural feedstock; lab-scale process; impact unusually high |
| 6         | Spruce Bark              | Primary Wood   | Organosolv                                                                       | Lignin          | 2.14                                                                | Included             |                                                                  |
|           | Tannin-Free Spruce Bark  | Primary Wood   | Organosolv                                                                       | Lignin          | 1.39                                                                | Included             |                                                                  |
|           | Tannin-Free Spruce Bark  | Primary Wood   | Organosolv                                                                       | Lignin          | 0.23                                                                | Included             |                                                                  |
| 7         | Beech                    | Primary Wood   | Fabiola Organosolv                                                               | Lignin          | 0.77                                                                | Included             |                                                                  |
|           | Beech                    | Primary Wood   | Fabiola Organosolv                                                               | Lignin          | -4.71                                                               | Rejected             | CO <sub>2</sub> uptake considered                                |

| Reference | Feedstock              | Feedstock Type    | Process                                                                     | Wood Derivative | Environmental Impact (kg CO2 eq. per 1kg of derivative) | Included or Rejected | Notes or Reasoning for Rejection         |
|-----------|------------------------|-------------------|-----------------------------------------------------------------------------|-----------------|---------------------------------------------------------|----------------------|------------------------------------------|
| 8         | Sulfite Pulp           | Primary Wood Pulp | Enzymatic + HPH (Homogenization)                                            | CNF             | 1.2                                                     | Included             |                                          |
|           | Sulfite Pulp           | Primary Wood Pulp | Enzymatic + HPH (Homogenization)                                            | CNF             | 3.1                                                     | Included             |                                          |
|           | Sulfite Pulp           | Primary Wood Pulp | TEMPO oxidation + HPH (Homogenization)                                      | CNF             | 1                                                       | Included             |                                          |
|           | Sulfite Pulp           | Primary Wood Pulp | TEMPO oxidation + HPH (Homogenization)                                      | CNF             | 1.8                                                     | Included             |                                          |
|           | Sulfite Pulp           | Primary Wood Pulp | TEMPO oxidation + mechanical refinement                                     | CNF             | 0.75                                                    | Included             |                                          |
|           | Sulfite Pulp           | Primary Wood Pulp | TEMPO oxidation + mechanical refinement                                     | CNF             | 1                                                       | Included             |                                          |
| 9         | Delignified Kraft Pulp | Primary Wood Pulp | TEMPO oxidation + Sonication + Centrifuge purifying (TOSO)                  | CNF             | 980                                                     | Rejected             | Lab-scale process; impact unusually high |
|           | Delignified Kraft Pulp | Primary Wood Pulp | TEMPO oxidation + Homogenization (TOHO)                                     | CNF             | 190                                                     | Rejected             | Lab-scale process; impact unusually high |
|           | Delignified Kraft Pulp | Primary Wood Pulp | Chloroacetic acid etherification + Sonication + Centrifuge purifying (CESO) | CNF             | 1160                                                    | Rejected             | Lab-scale process; impact unusually high |
|           | Delignified Kraft Pulp | Primary Wood Pulp | Chloroacetic acid etherification + Homogenization (CEHO)                    | CNF             | 360                                                     | Rejected             | Lab-scale process; impact unusually high |

| Reference | Feedstock          | Feedstock Type    | Process                                                                                                                        | Wood Derivative | Environmental Impact (kg CO2 eq. per 1kg of derivative) | Included or Rejected | Notes or Reasoning for Rejection                                 |
|-----------|--------------------|-------------------|--------------------------------------------------------------------------------------------------------------------------------|-----------------|---------------------------------------------------------|----------------------|------------------------------------------------------------------|
| 10        | Unbleached Sulfate | Primary Wood Pulp | Enzymatic pretreatment+ microfluidization                                                                                      | CNF             | 0.79                                                    | Included             |                                                                  |
|           | Sulphite Pulp      | Primary Wood Pulp | Carboxymethylation pretreatment + microfluidization                                                                            | CNF             | 99                                                      | Rejected             | Impact unusually high                                            |
|           | Unbleached Sulfate | Primary Wood Pulp | Without pretreatment + homogenization treatment                                                                                | CNF             | 1.2                                                     | Included             |                                                                  |
| 11        | Carrot Waste       | Food Waste        | MFC liberated (Aqueous Enzymatic treatment + homogenization) + Coating MFC with GripX + Wet spinning by adding Sodium Alginate | CNF             | 150                                                     | Rejected             | Agricultural feedstock; lab-scale process; impact unusually high |
|           | Carrot Waste       | Food Waste        | MFC liberated (Enzymatic + homogenization) + Coating MFC with GripX + Wet spinning by adding Sodium Alginate                   | CNF             | 160                                                     | Rejected             | Agricultural feedstock; lab-scale process; impact unusually high |
|           | Carrot Waste       | Food Waste        | MFC liberated (Enzymatic + homogenization) + Wet spinning by adding Sodium Alginate (without coating)                          | CNF             | 150                                                     | Rejected             | Agricultural feedstock; lab-scale process; impact unusually high |
|           | Carrot Waste       | Food Waste        | MFC liberated (Enzymatic + homogenization) + Wet spinning by adding Sodium Alginate (without coating)                          | CNF             | 160                                                     | Rejected             | Agricultural feedstock; lab-scale process; impact unusually high |
|           | Carrot Waste       | Food Waste        | MFC liberated (Enzymatic + homogenization) +                                                                                   | CNF             | 150                                                     | Rejected             | Agricultural feedstock; lab-scale process; impact unusually high |

| Reference | Feedstock           | Feedstock Type    | Process                                                                                         | Wood Derivative | Environmental Impact (kg CO2 eq. per 1kg of derivative) | Included or Rejected | Notes or Reasoning for Rejection                                                                         |
|-----------|---------------------|-------------------|-------------------------------------------------------------------------------------------------|-----------------|---------------------------------------------------------|----------------------|----------------------------------------------------------------------------------------------------------|
|           |                     |                   | electrospinning by adding PEO as a carrier polymer                                              |                 |                                                         |                      |                                                                                                          |
|           | Carrot Waste        | Food Waste        | MFC liberated (Enzymatic + homogenization) + electrospinning by adding PEO as a carrier polymer | CNF             | 160                                                     | Rejected             | Agricultural feedstock; lab-scale process; impact unusually high                                         |
| 12        | Carrot Waste        | Food Waste        | Bleaching, washing, Masuko grinding                                                             | CNF             | 0.0586                                                  | Included             | Included despite the food waste feedstock as it was one of the only data points for upscaled production. |
| 13        | Wood Waste Pulp     | Waste Wood Pulp   | High-pressure homogenization                                                                    | CNF             | 1.2                                                     | Rejected             | CO2 uptake considered                                                                                    |
|           | Wood Waste Pulp     | Waste Wood Pulp   | High-pressure homogenization                                                                    | CNF             | 2.4                                                     | Rejected             | CO2 uptake considered                                                                                    |
|           | Wood Waste Pulp     | Waste Wood Pulp   | Enzymatic pretreatment + Microfluidization                                                      | CNF             | 0.8                                                     | Rejected             | CO2 uptake considered                                                                                    |
|           | Wood Waste Pulp     | Waste Wood Pulp   | Enzymatic pretreatment + Microfluidization                                                      | CNF             | 1.6                                                     | Rejected             | CO2 uptake considered                                                                                    |
|           | Wood Waste Pulp     | Waste Wood Pulp   | Carboxy-methylation pretreatment + Microfluidization                                            | CNF             | 99                                                      | Rejected             | CO2 uptake considered                                                                                    |
|           | Wood Waste Pulp     | Waste Wood Pulp   | Carboxy-methylation pretreatment + Microfluidization                                            | CNF             | 110                                                     | Rejected             | CO2 uptake considered                                                                                    |
| 14        | Hardwood Kraft Pulp | Primary Wood Pulp | Enzymatic Treatments & Homogenization (ENZHO)                                                   | CNF             | 18.6                                                    | Rejected             | Lab-scale process                                                                                        |
| 15        | Coconut Fibers      | Food Waste        | EUC extraction (hydrolysis)                                                                     | CNC             | 1086.412                                                | N.A.                 | Agricultural feedstock; lab-scale process; impact unusually high                                         |

| Reference | Feedstock                           | Feedstock Type      | Process                                                           | Wood Derivative | Environmental Impact (kg CO2 eq. per 1kg of derivative) | Included or Rejected | Notes or Reasoning for Rejection                                        |
|-----------|-------------------------------------|---------------------|-------------------------------------------------------------------|-----------------|---------------------------------------------------------|----------------------|-------------------------------------------------------------------------|
|           | Cotton Fibers                       | Primary Cotton Pulp | EC extraction (hydrolysis)                                        | CNC             | 122.171                                                 | N.A.                 | <b>Agricultural feedstock; lab-scale process; impact unusually high</b> |
| 16        | Bleached Kraft Pulp from Wood Chips | Primary Wood Pulp   | pilot acid hydrolysis process                                     | CNC             | 29.64                                                   | N.A.                 |                                                                         |
| 17        | Coconut Fibers                      | Food Waste          | Extraction of CNC with high powered ultrasound (CNU)              | CNC             | 207                                                     | N.A.                 | <b>Agricultural feedstock; lab-scale process; impact unusually high</b> |
| 18        | Cotton Pulp                         | Primary Cotton Pulp | Sulphuric acid hydrolysis without acid separation                 | CNC             | 49.4                                                    | N.A.                 |                                                                         |
|           | Cotton Pulp                         | Primary Cotton Pulp | Sulphuric acid hydrolysis + gravity settling with acid separation | CNC             | 40.35                                                   | N.A.                 |                                                                         |
|           | Cotton Pulp                         | Primary Cotton Pulp | Sulphuric acid hydrolysis + centrifugation with acid separation   | CNC             | 40.87                                                   | N.A.                 |                                                                         |
|           | Cotton Pulp                         | Primary Cotton Pulp | Sulphuric acid hydrolysis + microfiltration with acid separation  | CNC             | 29.6                                                    | N.A.                 |                                                                         |
| 19        | Wood Pulp                           | Primary Wood Pulp   | Acid hydrolysis with acid recovery                                | CNC             | 11.39                                                   | N.A.                 |                                                                         |
|           | Wood Pulp                           | Primary Wood Pulp   | Acid hydrolysis without acid recovery                             | CNC             | 11.18                                                   | N.A.                 |                                                                         |



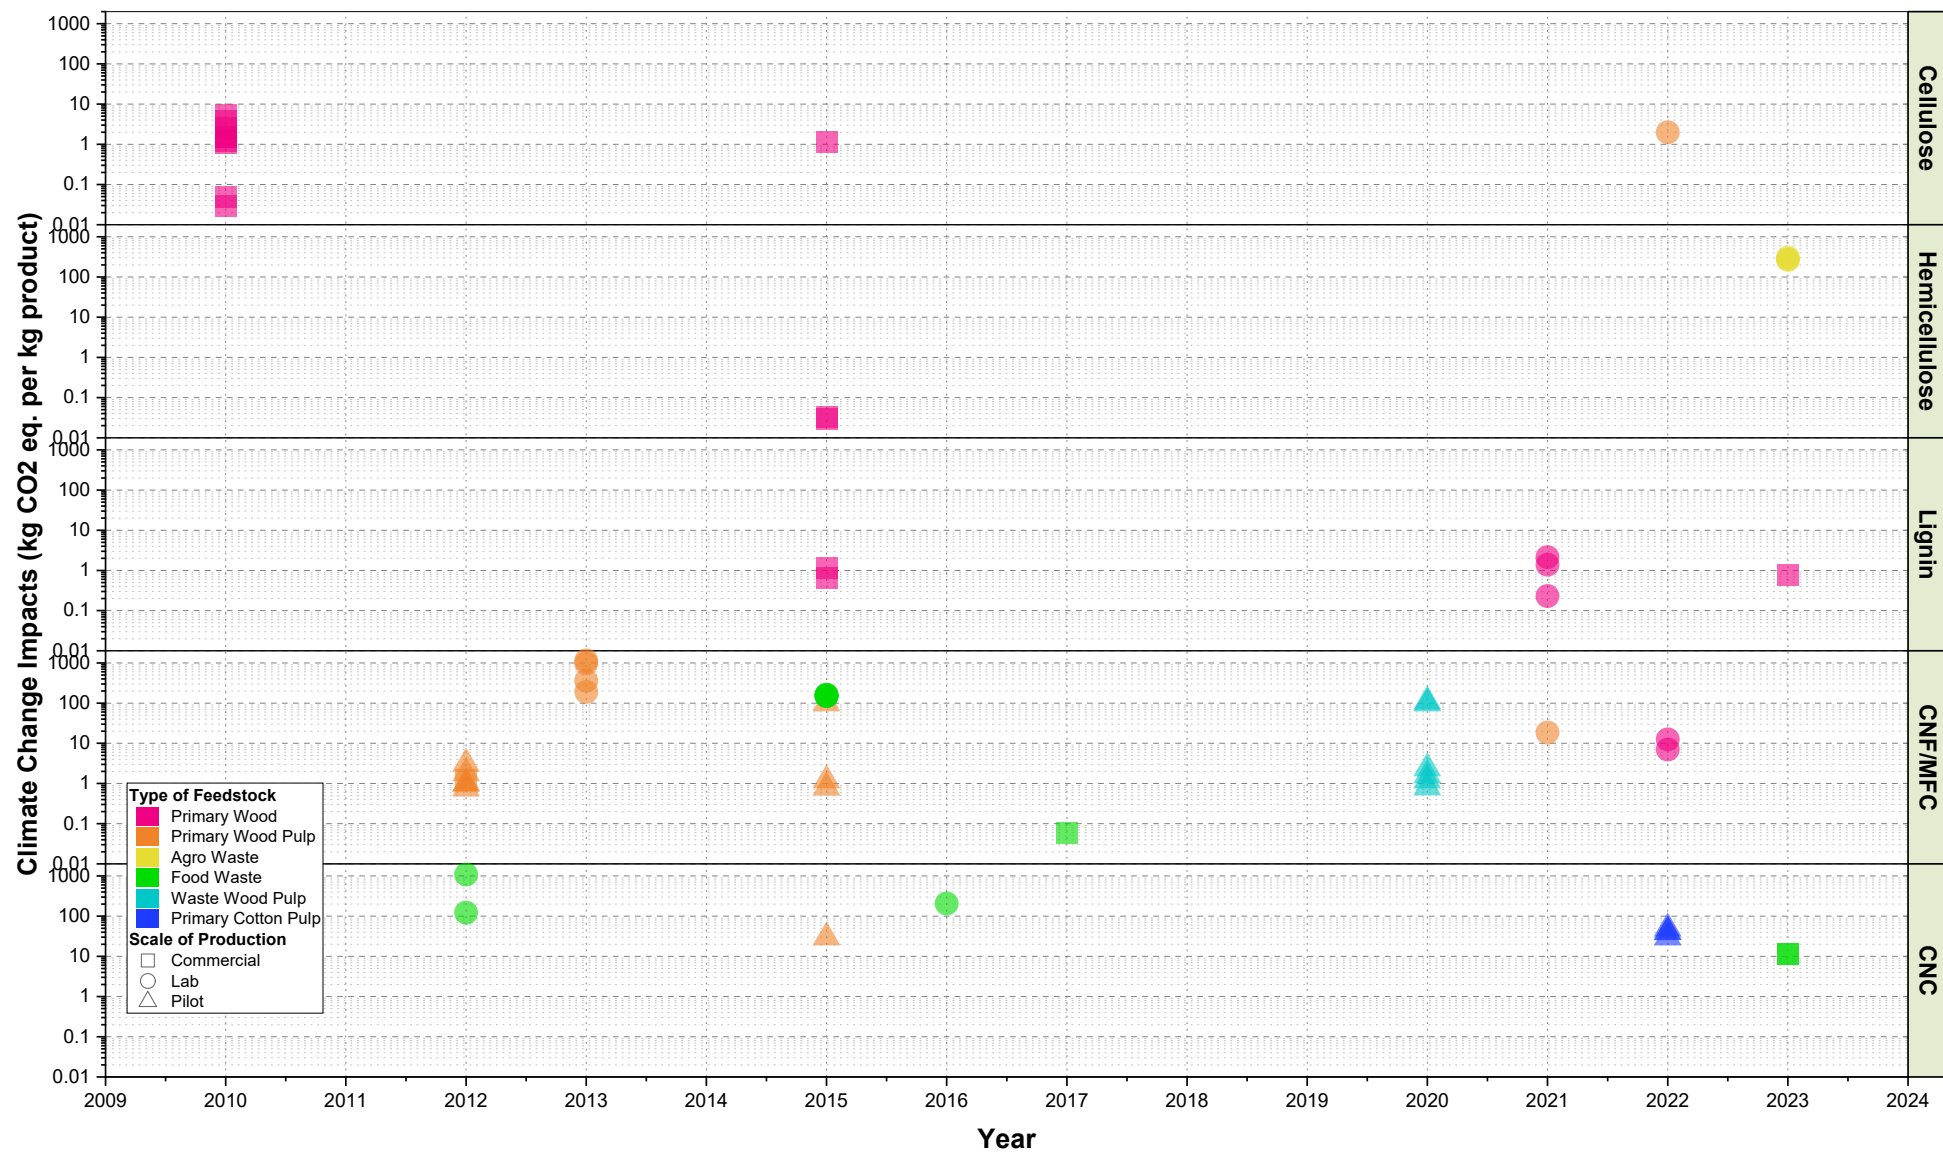

Supplementary Figure 1. All of the compiled data points in Supplementary Table 1 represent the climate change impacts from the production of different wood derivatives.

## Chapter 2: Carbon Dioxide Uptake Calculations for Bio-based Materials

The carbon dioxide uptake and release amounts for 1 kg each of the bio-based materials lignin, CNF, and PLA were calculated for each material. Stoichiometrically, 0.273 kg of carbon (C) produces 1 kg of carbon dioxide (CO<sub>2</sub>) and this value was used for calculating the biogenic carbon uptake/release values.

**Supplementary Table 2. Calculated carbon dioxide uptake and release amounts for 1 kg of lignin, CNF, and PLA.**

| Material (1 kg) | Carbon content [%] | CO <sub>2</sub> uptake and release [kg/kg material] | Source for carbon content |
|-----------------|--------------------|-----------------------------------------------------|---------------------------|
| Lignin          | 62.5               | 2.292                                               | [20]                      |
| CNF             | 44.4               | 1.628                                               | [21]                      |
| PLA             | 50                 | 1.833                                               | [21]                      |

## Chapter 3: Discounting Rate

The amount of biogenic carbon considered to be released after different storage periods from an original material stored 1 kg of biogenic carbon using an annual discount rate of 1% and a time horizon of 100 years was calculated for each scenario involving dynamic carbon accounting. 1 kg of biogenic carbon successfully stored within materials for 100 years and then released would be considered to have no emissions impact due to the long storage period achieved, while 1 kg of biogenic carbon released after a storage period of zero years would be considered to have the full emissions impact of the release of 1 kg of biogenic carbon. In this way, biogenic carbon emissions in the near future are weighted more heavily than emissions in the more distant future.

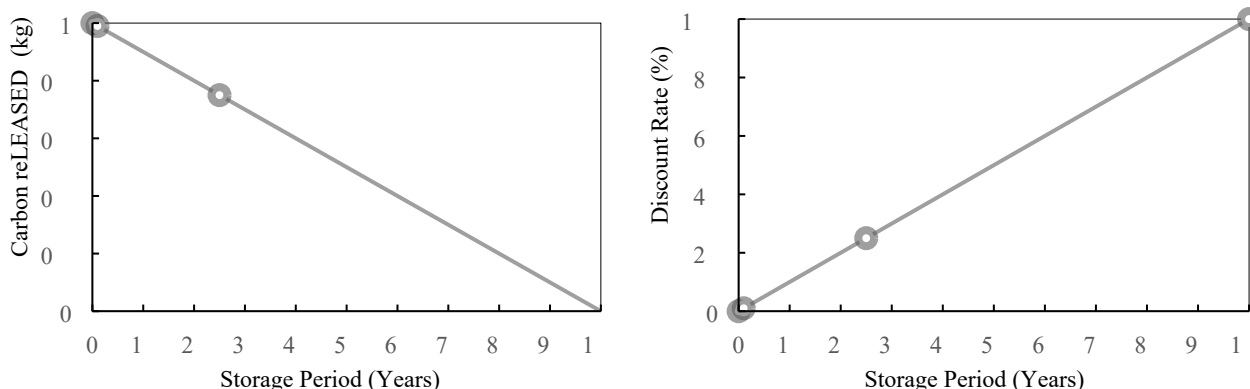

**Supplementary Figure 2. An illustration of dynamic carbon accounting over 100 years involving an annual discount rate of 1%.**

## Chapter 4: End-of-Life Options

Three End-of-Life (EoL) scenarios (incineration, landfilling, and a 'no emissions' scenario) were identified and all three were incorporated into the lifecycle scenarios for each of the bio-based materials lignin, cellulose (i.e. CNF), and PLA. It was assumed that an incineration scenario would result in the full release of stored biogenic carbon as carbon dioxide

and that a landfill scenario would result in stored biogenic carbon being released as 50% carbon dioxide and 50% methane due to partial anaerobic conditions. The 'no emissions' scenario assumes that no carbon is emitted at the EoL and represents scenarios in which PLA, lignin, and cellulose end up in landfills and are non-biodegradable.

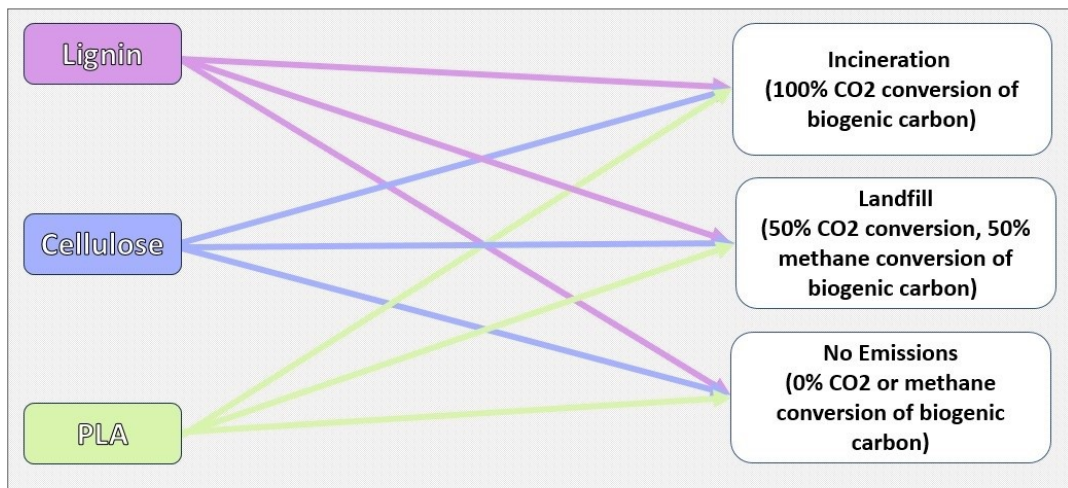

**Supplementary Figure 3. End-of-life scenarios analyzed for the bio-based materials.**

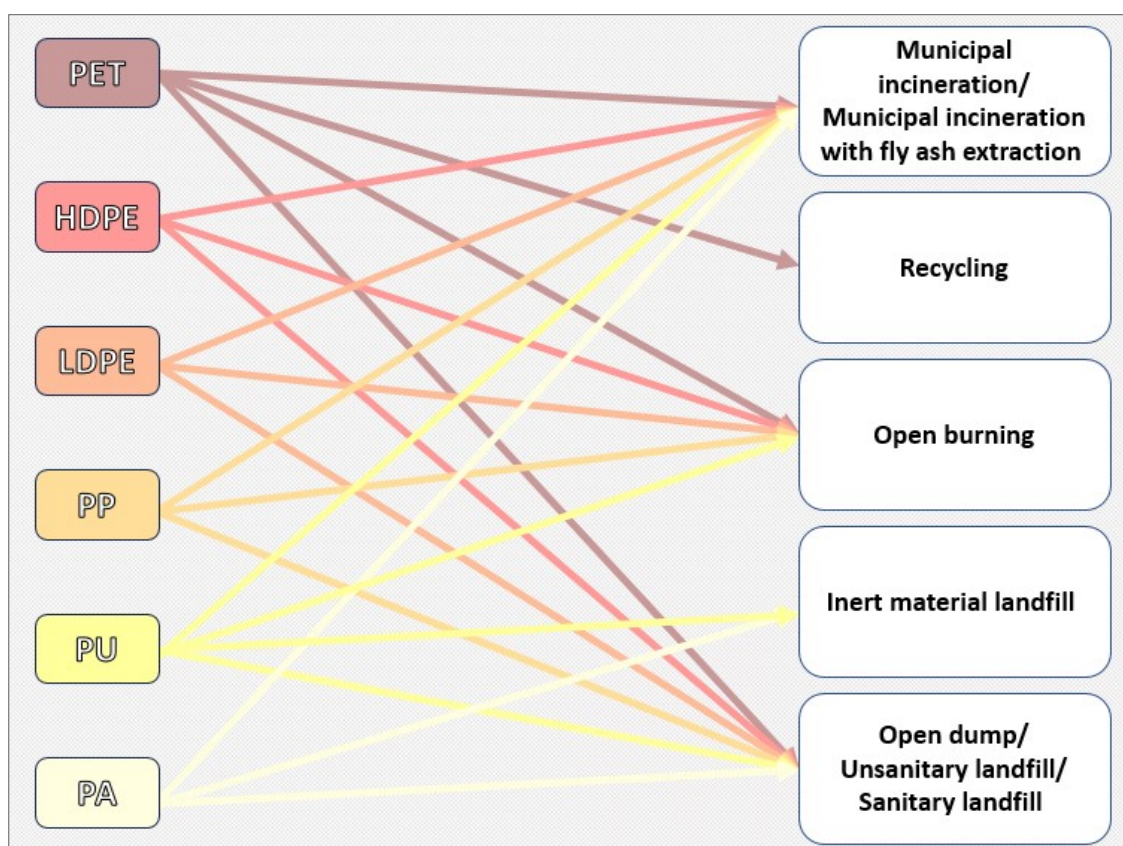

**Supplementary Figure 4. End-of-life scenarios analyzed for the fossil-based plastic polymers.**

Five potential EoL scenarios were identified and these were incorporated into the lifecycle scenarios for each petroleum-based plastic polymers PET, HDPE, LDPE, PP, PU, and PA. However, the selected EoL options were taken from the data

available in ecoinvent v3.9.1 and are not necessarily inclusive of all EoL options available for every polymer, e.g., recycling is possible for plastics besides PET, but the data on these scenarios was not available in ecoinvent<sup>22</sup>. Additionally, the number of production data sets varied between different polymers in ecoinvent, with PET having the highest number of data sets along with three possible EoL options (landfilling, recycling, and incineration). HDPE and LDPE both had fewer data points than PET, followed by PP, PU, and PA. None of the polymers, except for PET, had the datasets to model the EoL as recycling. This is particularly apparent in Figure 2(c) of the main text, wherein only PET has a trimodal life cycle impact distribution, where the middle mode represents the recycling of PET as an impact.

## Chapter 5: Life Cycle Climate Change Impacts of Materials

The total cumulative lifecycle climate change impacts for lignin, CNF, PLA, PET, HDPE, LDPE, PP, PU, and PA were calculated for each lifecycle scenario of the material and collated into the table below for reference.

**Supplementary Table 3. Total lifecycle climate change impacts for each material (in kg CO<sub>2</sub> eq. per kg of polymer) in each scenario.**

| Lignin |       | CNF   |      | PLA   | PET  |      |      |      |      |      | HDPE | LDPE | PP   | PU   | PA   |       |
|--------|-------|-------|------|-------|------|------|------|------|------|------|------|------|------|------|------|-------|
| 10.73  | 2.96  | -0.43 | 2.83 | 4.95  | 1.13 | 2.98 | 3.46 | 5.06 | 1.39 | 1.55 | 3.56 | 2.10 | 2.08 | 2.46 | 7.58 | 11.63 |
| 11.27  | 3.41  | -1.57 | 4.73 | 5.03  | 0.53 | 3.33 | 3.32 | 5.25 | 1.25 | 1.92 | 3.75 | 2.51 | 2.43 | 2.05 | 5.23 | 11.65 |
| 12.91  | 4.43  | 10.30 | 2.63 | 3.11  | 0.53 | 3.33 | 1.60 | 2.45 | 1.16 | 1.64 | 3.54 | 2.52 | 2.45 | 2.45 | 5.27 | 11.66 |
| 13.36  | 3.68  | 12.20 | 3.43 | 3.20  | 2.89 | 3.52 | 1.46 | 3.73 | 0.48 | 0.72 | 3.65 | 0.95 | 2.68 | 4.85 | 5.23 | 9.43  |
| 14.38  | 2.52  | 10.10 | 2.38 | 4.93  | 3.06 | 0.72 | 1.37 | 5.22 | 1.25 | 1.36 | 3.66 | 0.76 | 2.70 | 4.43 | 7.80 | 9.29  |
| 13.63  | 3.06  | 10.90 | 2.63 | 5.02  | 1.13 | 2.00 | 0.69 | 5.08 | 1.76 | 0.76 | 2.03 | 0.93 | 2.11 | 4.84 | 5.13 | 9.39  |
| 12.47  | 0.67  | 9.85  | 2.42 | 3.09  | 2.99 | 3.49 | 1.46 | 3.36 | 1.30 | 1.37 | 2.45 | 1.11 | 4.91 | 4.85 | 5.13 | 9.29  |
| 13.01  | 1.12  | 10.10 | 2.83 | 3.18  | 3.33 | 3.35 | 1.97 | 3.22 | 1.68 | 0.77 | 2.45 | 0.93 | 5.26 | 4.44 | 7.83 | 9.39  |
| 10.61  | 2.14  | 9.89  | 1.69 | 4.49  | 5.03 | 1.63 | 1.51 | 3.13 | 1.39 | 0.77 | 0.88 | 1.11 | 5.28 | 4.84 | 5.23 | 11.65 |
| 11.07  | 1.39  | 10.30 | 1.20 | 4.58  | 5.22 | 1.48 | 1.89 | 2.45 | 0.47 | 3.13 | 0.69 | 1.03 | 5.50 | 2.41 | 7.51 | 11.68 |
| 12.09  | 0.23  | 9.16  | 3.10 | 2.65  | 2.42 | 1.40 | 1.60 | 3.22 | 1.11 | 3.30 | 0.86 | 0.76 | 5.53 | 1.99 | 5.17 | 11.69 |
| 11.34  | 0.77  | 8.67  | 1.00 | 2.74  | 3.70 | 0.72 | 0.68 | 3.73 | 0.52 | 1.37 | 1.04 | 0.95 | 4.94 | 2.39 | 5.21 | 9.46  |
| 10.18  | 2.93  | 10.57 | 1.80 | 3.11  | 5.19 | 1.48 | 1.32 | 3.27 | 1.12 | 3.23 | 0.86 | 0.75 | 2.03 | 2.42 | 5.17 | 9.31  |
| 10.72  | 3.39  | 8.47  | 0.75 | 3.20  | 5.05 | 2.00 | 0.73 | 3.65 | 0.53 | 3.57 | 1.04 | 0.85 | 2.38 | 2.00 | 7.73 | 9.42  |
| 11.19  | 4.41  | 9.27  | 1.00 | 1.28  | 3.33 | 1.54 | 1.33 | 3.36 | 0.53 | 3.31 | 0.96 | 0.86 | 2.40 | 2.41 | 5.06 | 9.32  |
| 11.64  | 3.66  | 8.22  | 0.79 | 1.37  | 3.19 | 1.92 | 0.74 | 2.44 | 2.89 | 3.51 | 0.69 | 4.92 | 2.62 | 4.96 | 5.06 | 9.42  |
| 12.66  | 2.50  | 8.47  | 1.20 | 13.36 | 3.10 | 1.63 | 0.74 | 3.08 | 3.06 | 0.71 | 0.88 | 5.34 | 2.65 | 4.55 | 7.76 | 11.72 |
| 11.91  | 3.04  | 8.26  | 0.06 | 13.45 | 2.42 | 0.71 | 3.10 | 2.49 | 1.12 | 1.99 | 0.68 | 5.35 | 2.06 | 4.95 | 5.17 | 11.74 |
| 10.75  | 0.64  | 8.67  | 2.81 | 11.53 | 3.19 | 1.35 | 3.26 | 3.10 | 2.99 | 3.47 | 0.78 | 3.78 | 2.02 | 4.83 |      | 11.75 |
| 11.29  | 1.10  | 7.53  | 4.71 | 11.62 | 3.70 | 0.75 | 1.33 | 2.50 | 3.33 | 3.33 | 0.79 | 3.58 | 2.37 | 4.42 |      | 9.53  |
| 8.90   | 2.12  | 10.29 | 2.61 | 13.34 | 3.24 | 1.36 | 3.20 | 2.50 | 5.15 | 1.62 | 5.03 | 3.76 | 2.39 | 4.82 |      | 9.38  |
| 9.35   | 1.37  | 12.19 | 3.41 | 13.43 | 3.62 | 0.76 | 3.54 | 4.86 | 5.34 | 1.47 | 5.45 | 3.94 | 2.61 | 2.40 |      | 9.48  |
| 10.37  | 0.21  | 10.09 | 2.36 | 11.51 | 3.33 | 0.76 | 3.43 | 5.03 | 2.54 | 1.39 | 5.46 | 3.76 | 2.63 | 1.99 |      | 9.38  |
| 9.62   | 0.75  | 10.89 | 2.61 | 11.60 | 2.41 | 3.12 | 3.62 | 3.10 | 3.82 | 0.71 | 3.89 | 3.94 | 2.05 | 2.39 |      | 9.48  |
| 8.46   | 2.38  | 9.84  | 2.40 | 12.90 | 3.05 | 3.29 | 0.82 | 4.96 | 5.31 | 1.47 | 3.69 | 3.85 | 4.88 |      |      | 11.63 |
| 9.00   | 2.84  | 10.09 | 2.81 | 12.99 | 2.46 | 1.36 | 2.10 | 5.30 | 5.17 | 1.99 | 3.87 | 3.58 | 5.23 |      |      | 11.66 |
|        | 3.86  | 9.88  | 1.67 | 11.07 | 3.06 | 3.22 | 3.59 | 5.07 | 3.45 | 1.52 | 4.05 | 3.78 | 5.25 |      |      | 11.66 |
|        | 3.11  | 10.29 | 1.18 | 11.16 | 2.47 | 3.56 | 3.45 | 5.26 | 3.31 | 1.90 | 3.87 | 3.57 | 5.48 |      |      | 9.44  |
|        | 1.95  | 9.14  | 3.08 | 11.53 | 2.47 | 3.24 | 1.73 | 2.46 | 3.22 | 1.62 | 4.05 | 3.67 | 5.50 |      |      | 9.29  |
|        | 2.49  | 8.66  | 0.98 | 11.62 | 4.83 | 3.43 | 1.58 | 3.74 | 2.54 | 0.70 | 3.96 | 3.69 | 4.91 |      |      | 9.40  |
|        | 0.09  | 10.56 | 1.78 | 9.70  | 4.99 | 0.63 | 1.50 | 5.23 | 3.31 | 1.34 | 3.69 | 2.05 | 2.01 |      |      | 9.29  |
|        | 0.55  | 8.46  | 0.73 | 9.78  | 3.06 | 1.91 | 0.82 | 5.09 | 3.82 | 0.74 | 3.89 | 2.46 | 2.36 |      |      | 9.40  |
|        | 1.57  | 9.26  | 0.98 |       | 4.93 | 3.40 | 1.58 | 3.37 | 3.36 | 1.35 | 3.68 | 2.47 | 2.39 |      |      | 10.60 |
|        | 0.82  | 8.21  | 0.77 |       | 5.27 | 3.26 | 2.10 | 3.22 | 3.74 | 0.75 | 3.78 | 0.90 | 2.61 |      |      | 10.62 |
|        | -0.34 | 8.46  | 1.18 |       | 3.13 | 1.54 | 1.64 | 3.14 | 3.45 | 0.75 | 3.80 | 0.71 | 2.63 |      |      | 10.63 |
|        | 0.20  | 8.25  | 0.04 |       | 3.32 | 1.40 | 2.02 | 2.46 | 2.53 | 3.11 | 4.93 | 0.88 | 2.04 |      |      | 8.41  |
|        | 0.67  | 8.66  | 2.42 |       | 0.53 | 1.31 | 1.73 | 3.22 | 3.17 | 3.28 | 5.35 | 1.06 | 5.02 |      |      | 8.26  |
|        | 1.12  | 7.52  | 4.32 |       | 1.81 | 0.63 | 0.81 | 3.74 | 2.58 | 1.35 | 5.35 | 0.88 | 5.37 |      |      | 8.36  |
|        | 2.14  | 9.90  | 2.22 |       | 3.29 | 1.40 | 1.45 | 3.28 | 3.18 | 3.21 | 3.78 | 1.06 | 5.39 |      |      | 8.26  |

| Lignin | CNF   |       | PLA | PET  |      |      |      |      | HDPE | LDPE | PP   | PU   | PA |       |
|--------|-------|-------|-----|------|------|------|------|------|------|------|------|------|----|-------|
| 1.39   | 11.80 | 3.02  |     | 3.15 | 1.91 | 0.85 | 3.66 | 2.59 | 3.55 | 3.59 | 0.97 | 5.61 |    | 8.36  |
| 0.23   | 9.70  | 1.97  |     | 1.44 | 1.45 | 1.46 | 3.37 | 2.59 | 3.31 | 3.76 | 0.71 | 5.64 |    | 10.57 |
| 0.77   | 10.50 | 2.22  |     | 1.29 | 1.83 | 0.86 | 2.45 | 4.95 | 3.51 | 3.94 | 0.90 | 5.05 |    | 10.59 |
| -1.63  | 9.45  | 2.01  |     | 1.21 | 1.54 | 0.86 | 3.09 | 5.12 | 0.71 | 3.76 | 0.69 | 4.91 |    | 10.60 |
| -1.17  | 9.70  | 2.42  |     | 0.53 | 0.62 | 3.22 | 2.49 | 3.18 | 1.99 | 3.94 | 0.80 | 5.26 |    | 8.38  |
| -0.15  | 9.49  | 1.28  |     | 1.29 | 1.26 | 3.39 | 3.10 | 5.05 | 3.48 | 3.86 | 0.81 | 5.28 |    | 8.23  |
| -0.90  | 9.90  | 0.79  |     | 1.81 | 0.66 | 1.46 | 2.50 | 5.39 | 3.34 | 3.59 | 2.03 | 5.51 |    | 8.34  |
| -2.06  | 8.75  | 2.69  |     | 1.34 | 1.27 | 3.32 | 2.50 | 3.09 | 1.62 | 3.78 | 2.45 | 5.53 |    | 8.23  |
| -1.52  | 8.27  | 0.59  |     | 1.72 | 0.68 | 3.66 | 4.86 | 3.28 | 1.47 | 3.58 | 2.46 | 4.94 |    | 8.34  |
| 13.48  | 10.17 | 1.39  |     | 1.44 | 0.68 | 3.38 | 5.03 | 0.48 | 1.39 | 3.68 | 0.89 |      |    | 10.66 |
| 13.93  | 8.07  | 0.34  |     | 0.52 | 3.03 | 3.57 | 3.10 | 1.76 | 0.71 | 3.69 | 0.69 |      |    | 10.69 |
| 14.95  | 8.87  | 0.59  |     | 1.16 | 3.20 | 0.77 | 4.96 | 3.25 | 1.47 |      | 0.86 |      |    | 10.69 |
| 14.20  | 7.82  | 0.38  |     | 0.56 | 1.27 | 2.06 | 5.30 | 3.11 | 1.99 |      | 1.04 |      |    | 8.47  |
| 13.04  | 8.07  | 0.79  |     | 1.17 | 3.13 | 3.54 | 3.09 | 1.39 | 1.53 |      | 0.86 |      |    | 8.32  |
| 13.58  | 7.86  | -0.35 |     | 0.57 | 3.48 | 3.40 | 3.29 | 1.25 | 1.90 |      | 1.04 |      |    | 8.43  |
| 11.19  | 8.27  | 1.20  |     | 0.57 | 3.33 | 1.68 | 0.49 | 1.16 | 1.62 |      | 0.96 |      |    | 8.32  |
| 11.64  | 7.13  | 3.10  |     | 2.93 | 3.53 | 1.54 | 1.77 | 0.48 | 0.70 |      | 0.69 |      |    | 8.43  |
| 12.66  | 8.67  | 1.00  |     | 3.10 | 0.73 | 1.45 | 3.26 | 1.25 | 1.34 |      | 0.89 |      |    | 10.57 |
| 11.91  | 10.57 | 1.80  |     | 1.17 | 2.01 | 0.77 | 3.12 | 1.76 | 0.74 |      | 0.68 |      |    | 10.60 |
| 10.75  | 8.47  | 0.75  |     | 3.03 | 3.50 | 1.54 | 1.40 | 1.30 | 1.35 |      | 0.78 |      |    | 10.61 |
| 11.29  | 9.27  | 1.00  |     | 3.37 | 3.36 | 2.06 | 1.25 | 1.68 | 0.75 |      | 0.80 |      |    | 8.38  |
| 13.46  | 8.22  | 0.79  |     | 3.09 | 1.64 | 1.59 | 1.17 | 1.39 | 0.75 |      | 4.90 |      |    | 8.23  |
| 13.91  | 8.47  | 1.20  |     | 3.28 | 1.49 | 1.97 | 0.49 | 0.47 | 3.11 |      | 5.31 |      |    | 8.34  |
| 14.93  | 8.26  | 0.06  |     | 0.48 | 1.41 | 1.68 | 1.25 | 1.11 | 3.28 |      | 5.32 |      |    | 8.23  |
| 14.18  | 8.67  | -0.43 |     | 1.76 | 0.73 | 0.76 | 1.77 | 0.51 | 1.35 |      | 3.75 |      |    | 8.34  |
| 13.02  | 7.53  | 1.47  |     | 3.25 | 1.49 | 1.40 | 1.31 | 1.12 | 3.21 |      | 3.56 |      |    |       |
| 13.56  | 7.05  | -0.63 |     | 3.11 | 2.01 | 0.81 | 1.68 | 0.53 | 3.55 |      | 3.73 |      |    |       |
| 11.16  | 8.95  | 0.17  |     |      | 3.35 | 1.42 | 1.40 | 0.53 | 3.30 |      | 3.91 |      |    |       |
| 11.62  | 6.85  | -0.88 |     |      | 1.42 | 0.82 | 0.48 | 2.88 | 3.49 |      | 3.73 |      |    |       |
| 12.64  | 7.65  | -0.63 |     |      | 3.28 | 0.82 | 1.12 | 3.05 | 0.69 |      | 3.91 |      |    |       |
| 11.89  | 6.60  | -0.84 |     |      | 3.62 | 3.18 | 0.52 | 1.12 | 1.97 |      | 3.82 |      |    |       |
|        | 6.85  |       |     |      |      |      |      |      |      |      |      |      |    |       |
|        | 6.64  |       |     |      |      |      |      |      |      |      |      |      |    |       |
|        | 7.05  |       |     |      |      |      |      |      |      |      |      |      |    |       |
|        | 5.90  |       |     |      |      |      |      |      |      |      |      |      |    |       |

## Chapter 6: References

- 1 S. Li and M. Patel, *Lenzinger Berichte*, 2010, **88**, 1–59.
- 2 I. S. Modahl, A. Brekke and C. Valente, *J. Clean. Prod.*, 2015, **94**, 247–259.
- 3 H. Nadeem, M. Dehghani, G. Garnier and W. Batchelor, *J. Clean. Prod.*, 2022, **342**, 130890.
- 4 B. Gilani and P. R. Stuart, *Biofuels, Bioprod. Biorefining*, 2015, **9**, 677–695.
- 5 X. Guo, Y. Xie, P. Xiao, Z. Ma, H. Zhao, G. Li, H. Du and Y. Lv, *J. Clean. Prod.*, 2023, **412**, 137420.
- 6 P. Yadav, D. Athanassiadis, I. Antonopoulou, U. Rova, P. Christakopoulos, M. Tysklind and L. Matsakas, *J. Clean. Prod.*, 2021, **279**, 123515.
- 7 H. E. Wray, S. Luzzi, P. D'Arrigo and G. Griffini, *ACS Sustain. Chem. Eng.*, DOI:10.1021/acssuschemeng.3c00619.
- 8 C. Hohenthal, M. Ovaskainen, D. Bussini, P. Sadocco, T. Pajula, H. Lehtinen, J. Kautto and K. Salmenkivi, *Final Assessment of Nano Enhanced New Products*, 2012.
- 9 Q. Li, S. McGinnis, C. Sydnor, A. Wong and S. Rennecker, *ACS Sustain. Chem. Eng.*, 2013, **1**, 919–928.

- 10 R. Arvidsson, D. Nguyen and M. Svanström, *Environ. Sci. Technol.*, 2015, **49**, 6881–6890.
- 11 F. Piccinno, R. Hischer, S. Seeger and C. Som, *ACS Sustain. Chem. Eng.*, 2015, **3**, 1047–1055.
- 12 INCOM, *Industrial Production Processes for Nanoreinforced Composite Structures: Life Cycle Assessment*, 2017.
- 13 L. Berglund, L. Breedveld and K. Oksman, *J. Clean. Prod.*, 2020, **255**, 120274.
- 14 P. Gallo Stampino, L. Riva, C. Punta, G. Elegir, D. Bussini and G. Dotelli, *Molecules*, 2021, **26**, 2558.
- 15 M. C. B. de Figueirêdo, M. de F. Rosa, C. M. L. Ugaya, M. de S. M. de Souza Filho, A. C. C. da Silva Braid and L. F. L. de Melo, *J. Clean. Prod.*, 2012, **35**, 130–139.
- 16 H. Gu, R. Reiner, R. Bergman and A. Rudie, in *Proceedings from the LCA XV Conference - A bright green future.*, Vancouver, British Columbia, 2015.
- 17 D. M. do Nascimento, A. F. Dias, C. P. de Araújo Junior, M. de F. Rosa, J. P. S. Morais and M. C. B. de Figueirêdo, *Ind. Crops Prod.*, 2016, **93**, 58–65.
- 18 L. Zhang, X. Jia, Y. Ai, R. Huang, W. Qi, Z. He, J. J. Klemeš and R. Su, *J. Clean. Prod.*, 2022, **345**, 131073.
- 19 N. Rajendran, T. Runge, R. D. Bergman, P. Nepal and C. Houtman, *Bioresour. Technol.*, 2023, **377**, 128955.
- 20 A. Bengtsson, J. Bengtsson, M. Sedin and E. Sjöholm, *ACS Sustain. Chem. Eng.*, 2019, **7**, 8440–8448.
- 21 A. Bengtsson, P. Hecht, J. Sommertune, M. Ek, M. Sedin and E. Sjöholm, *ACS Sustain. Chem. Eng.*, 2020, **8**, 6826–6833.
- 22 G. Wernet, C. Bauer, B. Steubing, J. Reinhard, E. Moreno-Ruiz and B. Weidema, *Int. J. Life Cycle Assess.*, 2016, **21**, 1218–1230.
