# Supplementary material for: Unraveling the climate neutrality of wood derivatives and biopolymers
Source: Royal Society of Chemistry journal article supplement (doi:10.1039/d4su00010b), 2024-01-01
Supplement: d4su00010b2.xlsx [file d4su00010b2.xlsx]

## Sheet: Supp_Table1
Supplementary Table 1. Literature reviewed on the climate change impacts of the production of wood derivatives.
Year	Feedstock	Feedstock_Type	Process	Reported Wood Derivative	Wood Derivative	Functional Unit	Unit	ReportedScale	Scale	CO2 Uptake Considered?	Environmental Impact (GWP), as reported	Unit	Environmental Impact (GWP) in kg CO2eq, normalized per 1 kg	Applications Mentioned	Selected Quotes	Literature	Further Info
2010	Eucalyptus wood	Primary Wood	Viscose Process	Cellulose	Cellulose	1000	kg	Commercial	Commercial	Yes	3.8	tons CO2eq	3.8	Conventional cotton, novel bio-based fibres (PLA fibres), and fossil fuel-based fibres (PET and PP)	Paper includes details of viscose and lyocell processes	https://proyectaryproducir.com.ar/public_html/Seminarios_Posgrado/Material_de_referencia/LIFE%20CYCLE%20ASSESSMENT%20OF%20MAN-MADE%20CELLULOSE%20FIBRES.pdf
2010	Eucalyptus wood	Primary Wood	Viscose Process	Cellulose	Cellulose	1000	kg	Commercial	Commercial	No	5.3	tons CO2eq	5.3	Conventional cotton, novel bio-based fibres (PLA fibres), and fossil fuel-based fibres (PET and PP)	Without accounting for biogenic carbon embedded in product, GWP is 5.3 tons of CO2eq per ton of cellulose	https://proyectaryproducir.com.ar/public_html/Seminarios_Posgrado/Material_de_referencia/LIFE%20CYCLE%20ASSESSMENT%20OF%20MAN-MADE%20CELLULOSE%20FIBRES.pdf
2010	Eucalyptus and beech wood	Primary Wood	Lyocell Process	Cellulose	Cellulose	1000	kg	Commercial	Commercial	Yes	1.1	tons CO2eq	1.1	Conventional cotton, novel bio-based fibres (PLA fibres), and fossil fuel-based fibres (PET and PP)		https://proyectaryproducir.com.ar/public_html/Seminarios_Posgrado/Material_de_referencia/LIFE%20CYCLE%20ASSESSMENT%20OF%20MAN-MADE%20CELLULOSE%20FIBRES.pdf
2010	Eucalyptus and beech wood	Primary Wood	Lyocell Process	Cellulose	Cellulose	1000	kg	Commercial	Commercial	No	2.5	tons CO2eq	2.5	Conventional cotton, novel bio-based fibres (PLA fibres), and fossil fuel-based fibres (PET and PP)	Without accounting for biogenic carbon embedded in product, GWP is 2.5 tons of CO2eq per ton of cellulose	https://proyectaryproducir.com.ar/public_html/Seminarios_Posgrado/Material_de_referencia/LIFE%20CYCLE%20ASSESSMENT%20OF%20MAN-MADE%20CELLULOSE%20FIBRES.pdf
2010	Eucalyptus and beech wood	Primary Wood	Lyocell Process	Cellulose	Cellulose	1000	kg	Commercial	Commercial	Yes	0.05	tons CO2eq	0.05	Conventional cotton, novel bio-based fibres (PLA fibres), and fossil fuel-based fibres (PET and PP)		https://proyectaryproducir.com.ar/public_html/Seminarios_Posgrado/Material_de_referencia/LIFE%20CYCLE%20ASSESSMENT%20OF%20MAN-MADE%20CELLULOSE%20FIBRES.pdf
2010	Eucalyptus and beech wood	Primary Wood	Lyocell Process	Cellulose	Cellulose	1000	kg	Commercial	Commercial	No	1.5	tons CO2eq	1.5	Conventional cotton, novel bio-based fibres (PLA fibres), and fossil fuel-based fibres (PET and PP)	Without accounting for biogenic carbon embedded in product, GWP is 1.5 tons of CO2eq per ton of cellulose	https://proyectaryproducir.com.ar/public_html/Seminarios_Posgrado/Material_de_referencia/LIFE%20CYCLE%20ASSESSMENT%20OF%20MAN-MADE%20CELLULOSE%20FIBRES.pdf
2010	European beech wood	Primary Wood	Viscose Process	Cellulose	Cellulose	1000	kg	Commercial	Commercial	Yes	0.03	tons CO2eq	0.03	Conventional cotton, novel bio-based fibres (PLA fibres), and fossil fuel-based fibres (PET and PP)		https://proyectaryproducir.com.ar/public_html/Seminarios_Posgrado/Material_de_referencia/LIFE%20CYCLE%20ASSESSMENT%20OF%20MAN-MADE%20CELLULOSE%20FIBRES.pdf
2010	European beech wood	Primary Wood	Viscose Process	Cellulose	Cellulose	1000	kg	Commercial	Commercial	No	1.5	tons CO2eq	1.5	Conventional cotton, novel bio-based fibres (PLA fibres), and fossil fuel-based fibres (PET and PP)	Without accounting for biogenic carbon embedded in product, GWP is 1.5 tons of CO2eq per ton of cellulose	https://proyectaryproducir.com.ar/public_html/Seminarios_Posgrado/Material_de_referencia/LIFE%20CYCLE%20ASSESSMENT%20OF%20MAN-MADE%20CELLULOSE%20FIBRES.pdf
2010	European beech wood	Primary Wood	Viscose Process	Cellulose	Cellulose	1000	kg	Commercial	Commercial	Yes	-0.25	tons CO2eq	-0.25	Conventional cotton, novel bio-based fibres (PLA fibres), and fossil fuel-based fibres (PET and PP)		https://proyectaryproducir.com.ar/public_html/Seminarios_Posgrado/Material_de_referencia/LIFE%20CYCLE%20ASSESSMENT%20OF%20MAN-MADE%20CELLULOSE%20FIBRES.pdf
2010	European beech wood	Primary Wood	Viscose Process	Cellulose	Cellulose	1000	kg	Commercial	Commercial	No	1.2	tons CO2eq	1.2	Conventional cotton, novel bio-based fibres (PLA fibres), and fossil fuel-based fibres (PET and PP)	Without accounting for biogenic carbon embedded in product, GWP is 1.2 tons of CO2eq per ton of cellulose	https://proyectaryproducir.com.ar/public_html/Seminarios_Posgrado/Material_de_referencia/LIFE%20CYCLE%20ASSESSMENT%20OF%20MAN-MADE%20CELLULOSE%20FIBRES.pdf
2015	Norwegian Spruce	Primary Wood	Borregaard	Cellulose	Cellulose	1000	kg	Commercial	Commercial	No	1160	kg CO2eq	1.16	The current study focuses on ethanol 96%, ethanol 99%,1 cellulose, liquid lignin, lignin powder and vanillin. These products are used in pharmaceuticals, chemical and technical applications, building materials, feed, food, textiles, and biofuel.	The study has been carried out using the life cycle assessment method from “cradle to gate”.	https://doi.org/10.1016/j.jclepro.2015.01.054
2022	Eucalyptus wood - bleached sulphate pulp	Primary Wood Pulp	Kraft wood pulping	Cellulose	Cellulose	2	g dry CNF film	Lab	Lab	No	0.004	kg CO2eq	2	petroleum-based polymers such as polyethylene tere_x0002_phthalate (PET), polyethylene naphthalate (PEN) and polyimides (PIs)		https://doi.org/10.1016/j.jclepro.2022.130890
2015	Mixed Hardwood Woodchips	Primary Wood	Extraction and concentration of hemicellulose to 70% dry content via evaporation	Hemicellulose	Hemicellulose	310000	tons	Commercial	Commercial	No	9227000	kg CO2eq	0.0297645	Molasses from sugar beets	Life cycle inventory and impacts were calculated for a reference flow of approximately 310 000 tons per year of dilute hemicellulose stream (5% solid) that was used for different production pathways. Due to the cut-off procedure, the existing pulp and paper mill product was not considered in the functional unit	https://doi.org/10.1002/bbb.1570
2015	Mixed Hardwood Woodchips	Primary Wood	Extraction and concentration of hemicellulose to 50% dry content via evaporation	Hemicellulose	Hemicellulose	310000	tons	Commercial	Commercial	No	10292000	kg CO2eq	0.0332	Sugar from sugar cane	Life cycle inventory and impacts were calculated for a reference flow of approximately 310 000 tons per year of dilute hemicellulose stream (5% solid) that was used for different production pathways. Due to the cut-off procedure, the existing pulp and paper mill product was not considered in the functional unit	https://doi.org/10.1002/bbb.1570
2023	sugarcane bagasse pith	Agro Waste	ultrasound-assisted alkaline extraction	Hemicellulose	Hemicellulose	1	g	Lab	Lab	No	0.277	kg CO2eq	277	Improving oxygen resistance for packaging film, replacing petroleum based packaging	Few studies have focused on the environmental assessment of hemicellulose extraction from biomass, and the vast ma_x0002_jority of studies are based on simulated data.	https://doi.org/10.1016/j.jclepro.2023.137420
2023	sugarcane bagasse pith	Agro Waste	ultrasound-assisted alkaline extraction	Hemicellulose (Alkali-soluble)	Hemicellulose	1	g	Lab	Lab	No	0.306	kg CO2eq	306	Improving oxygen resistance for packaging film, replacing petroleum based packaging	AHC is mainly obtained by washing and drying hemicellulose.	https://doi.org/10.1016/j.jclepro.2023.137420
2023	sugarcane bagasse pith	Agro Waste	ultrasound-assisted alkaline extraction	Hemicellulose (Water-soluble)	Hemicellulose	1	g	Lab	Lab	No	0.267	kg CO2eq	267	Improving oxygen resistance for packaging film, replacing petroleum based packaging	WHC was separated and extracted by rotary evaporation, sedimentation, centrifugation and other processes.	https://doi.org/10.1016/j.jclepro.2023.137420
2015	Norwegian Spruce	Primary Wood	Borregaard	Lignin (liquid)	Lignin	1000	kg	Commercial	Commercial	No	666	kg CO2eq	0.666	"The current study focuses on ethanol 96%, ethanol 99%,1 cellulose, liquid lignin, lignin powder and vanillin. These products are used in pharmaceuticals, chemical and technical applications, building materials, feed, food, textiles, and biofuel."	One explanation as to why liquid lignin has a lower GWP than lignin powder, cellulose and vanillin is that no energy is used for the removal of water	https://doi.org/10.1016/j.jclepro.2015.01.054
2015	Norwegian Spruce	Primary Wood	Borregaard	Lignin (powder)	Lignin	1000	kg	Commercial	Commercial	No	1120	kg CO2eq	1.12	"The current study focuses on ethanol 96%, ethanol 99%,1 cellulose, liquid lignin, lignin powder and vanillin. These products are used in pharmaceuticals, chemical and technical applications, building materials, feed, food, textiles, and biofuel."		https://doi.org/10.1016/j.jclepro.2015.01.054
2021	Spruce Bark	Primary Wood	Organosolv (Baseline scenario)	Lignin	Lignin	1	kg	Lab	Lab	No	2.14	kg CO2eq	2.14	Renewable fuel and high-added value applications.	The baseline scenario considered the whole biorefinery process that produces lignin together with other co-products (tannin, cellulose and hemicellulose)	https://doi.org/10.1016/j.jclepro.2020.123515
2021	Tannin-Free Spruce Bark	Primary Wood	Organosolv (Scenario 1)	Lignin	Lignin	1	kg	Lab	Lab	No	1.39	kg CO2eq	1.39	Renewable fuel and high-added value applications.	In scenario S1 it was assumed, that the TFB that was used as a feedstock in the lignin production was a by-product of tannin production and thus did not carry any upstream emissions	https://doi.org/10.1016/j.jclepro.2020.123515
2021	Tannin-Free Spruce Bark	Primary Wood	Organosolv (Scenario 2)	Lignin	Lignin	1	kg	Lab	Lab	No	0.23	kg CO2eq	0.23	Renewable fuel and high-added value applications.	In scenario S2, similarly to S1, it was assumed that the TFB that was used as a feedstock in the lignin production was a by-product of tannin production and thus did not carry any upstream emissions.Scenario S2 calculated the environmental impact solely associated to lignin production	https://doi.org/10.1016/j.jclepro.2020.123515
2023	Beech	Primary Wood	Fabiola Organosolv	Lignin	Lignin	1	kg	Commercial	Commercial	No	0.77	kg CO2eq	0.77	Building block in polyurethane coatings for coatings, foams, adhesives, sealants, and elastomers	The impacts for lignin extraction are somewhat lower when compared to other studies, which report between 1.42 and 1.85 kg CO2eq/kg lignin, for different biomasses and extraction processes	https://doi.org/10.1021/acssuschemeng.3c00619	Supporting Info available with inventory data and allocation details
2023	Beech	Primary Wood	Fabiola Organosolv	Lignin	Lignin	1	kg	Commercial	Commercial	Yes	−4.71	kg CO2eq	−4.71	Building block in polyurethane coatings for coatings, foams, adhesives, sealants, and elastomers	If CO2 uptake is considered, negative emissions (−4.71 kg CO2eq/kg lignin) are calculated via the life cycle model (with 2.26 kg CO2eq/kg lignin actually stored in the final OSL).	https://doi.org/10.1021/acssuschemeng.3c00619	Supporting Info available with inventory data and allocation details
2012	Sulfite Pulp	Primary Wood Pulp	Enzymatic + HPH	CNF	CNF/MFC	1000	kg	Pilot*	Commercial	No	1200	kg CO2eq	1.2	Two applications were selected for life cycle assessment: board (SBS), where NFC was added to the coating, replacing latex, and wet-laid non-woven, where NFC replaces raw materials and enables a lowering of the basis weight.	Hohenthal et al. evaluated the environmental impact of CNF for the first time. Their study was based on the cradle-to-gate LCA for the production of one-ton CNF using sulfite pulp as raw material and three different processing routes shown in Table 4 and two laboratories and one pilot-scale study. Data is a mix of pilot and lab scale, we will consider as pilot due to output being 1000 kg	https://doi.org/10.3390/ma14040714 Hohenthal, C. et al. Final assessment of nano enhanced new products. In SUNPAP Oct.31, 2012.
2012	Sulfite Pulp	Primary Wood Pulp	Enzymatic + HPH	CNF	CNF/MFC	1000	kg	Pilot	Pilot	No	3100	kg CO2eq	3.1	Two applications were selected for life cycle assessment: board (SBS), where NFC was added to the coating, replacing latex, and wet-laid non-woven, where NFC replaces raw materials and enables a lowering of the basis weight.	Differences in values from same production method in this paper is due to differences in assumptions as to where the product is being produced (Finland vs France) and associated differences in energy sources and electricity mix. Data is a mix of pilot and lab scale, we will consider as pilot due to output being 1000 kg.	https://doi.org/10.3390/ma14040714 Hohenthal, C. et al. Final assessment of nano enhanced new products. In SUNPAP Oct.31, 2012.
2012	Sulfite Pulp	Primary Wood Pulp	TEMPO oxidation + HPH (Homogenization)	CNF	CNF/MFC	1000	kg	Pilot	Pilot	No	1000	kg CO2eq	1	Two applications were selected for life cycle assessment: board (SBS), where NFC was added to the coating, replacing latex, and wet-laid non-woven, where NFC replaces raw materials and enables a lowering of the basis weight.		https://doi.org/10.3390/ma14040714 Hohenthal, C. et al. Final assessment of nano enhanced new products. In SUNPAP Oct.31, 2012.
2012	Sulfite Pulp	Primary Wood Pulp	TEMPO oxidation + HPH (Homogenization)	CNF	CNF/MFC	1000	kg	Pilot	Pilot	No	1800	kg CO2eq	1.8	Two applications were selected for life cycle assessment: board (SBS), where NFC was added to the coating, replacing latex, and wet-laid non-woven, where NFC replaces raw materials and enables a lowering of the basis weight.		https://doi.org/10.3390/ma14040714 Hohenthal, C. et al. Final assessment of nano enhanced new products. In SUNPAP Oct.31, 2012.
2012	Sulfite Pulp	Primary Wood Pulp	TEMPO oxidation + mechanical refinement	CNF	CNF/MFC	1000	kg	Pilot	Pilot	No	750	kg CO2eq	0.75	Two applications were selected for life cycle assessment: board (SBS), where NFC was added to the coating, replacing latex, and wet-laid non-woven, where NFC replaces raw materials and enables a lowering of the basis weight.		https://doi.org/10.3390/ma14040714 Hohenthal, C. et al. Final assessment of nano enhanced new products. In SUNPAP Oct.31, 2012.
2012	Sulfite Pulp	Primary Wood Pulp	TEMPO oxidation + mechanical refinement	CNF	CNF/MFC	1000	kg	Pilot	Pilot	No	1000	kg CO2eq	1	Two applications were selected for life cycle assessment: board (SBS), where NFC was added to the coating, replacing latex, and wet-laid non-woven, where NFC replaces raw materials and enables a lowering of the basis weight.		https://doi.org/10.3390/ma14040714 Hohenthal, C. et al. Final assessment of nano enhanced new products. In SUNPAP Oct.31, 2012.
2013	Delignified kraft pulp	Primary Wood Pulp	TEMPO oxidation + Sonication + Centrifuge purifying (TOSO)	MFC	CNF/MFC	10	g	Lab	Lab	No	9.8	kg CO2eq	980	Polymer reinforcement and transparent films	For the 3 processes and 2 electricity generation scenarios studied in the previous work by Hohenthal, et al., the GWP values range from 0.7−3.0 kg CO2 equiv/kg nanocellulose. From the data in Table 3, the GWP values for this study range from 190 to 1160 kg CO2 equiv/kg nanocellulose. It is clear that the electricity inputs for the Hohenthal et al. LCA have orders of magnitude less direct electric…	dx.doi.org/10.1021/sc4000225 https://doi.org/10.3390/ma14040714
2013	Delignified kraft pulp	Primary Wood Pulp	TEMPO oxidation + Homogenization (TOHO)	MFC	CNF/MFC	10	g	Lab	Lab	No	1.9	kg CO2eq	190	Polymer reinforcement and transparent films		dx.doi.org/10.1021/sc4000225 https://doi.org/10.3390/ma14040714
2013	Delignified kraft pulp	Primary Wood Pulp	Chloroacetic acid etherification + Sonication + Centrifuge purifying (CESO)	MFC	CNF/MFC	10	g	Lab	Lab	No	11.6	kg CO2eq	1160	Polymer reinforcement and transparent films		dx.doi.org/10.1021/sc4000225 https://doi.org/10.3390/ma14040714
2013	Delignified kraft pulp	Primary Wood Pulp	Chloroacetic acid etherification + Homogenization (CEHO)	MFC	CNF/MFC	10	g	Lab	Lab	No	3.6	kg CO2eq	360	Polymer reinforcement and transparent films		dx.doi.org/10.1021/sc4000225 https://doi.org/10.3390/ma14040714
2015	Unbleached sulfate sulphite pulp	Primary Wood Pulp	Enzymatic pretreatment+ microfluidization	CNF	CNF/MFC	1	kg	Pilot	Pilot	No	0.79	kg CO2eq	0.79	Comparable traditional materials are aluminum, steel, and polypropylene		https://doi.org/10.1021/acs.est.5b00888 https://doi.org/10.3390/ma14040714	Supporting Info available
2015	Unbleached sulfate sulphite pulp	Primary Wood Pulp	Carboxymethylation pretreatment + microfluidization	CNF	CNF/MFC	1	kg	Pilot	Pilot	No	99	kg CO2eq	99	Comparable traditional materials are aluminum, steel, and polypropylene	The results show that CNF produced via the carboxymethylation route clearly has the highest environmental impacts due to large use of solvents made from crude oil.	https://doi.org/10.1021/acs.est.5b00888 https://doi.org/10.3390/ma14040714	Supporting Info available
2015	Unbleached sulfate sulphite pulp	Primary Wood Pulp	Without pretreatment + homogenization treatment	CNF	CNF/MFC	1	kg	Pilot	Pilot	No	1.2	kg CO2eq	1.2	Comparable traditional materials are aluminum, steel, and polypropylene		https://doi.org/10.1021/acs.est.5b00888 https://doi.org/10.3390/ma14040714	Supporting Info available
2015	Carrot waste	Food Waste	MFC liberated (Aqueous Enzymatic treatment + homogenization) + Coating MFC with GripX + Wet spinning by adding Sodium Alginate (route 1a)	MFC	CNF/MFC	10	g	Lab	Lab	No	1.5	kg CO2eq	150	Food packaging because of its barrier properties, to medical applications or use in organic displays, thanks to its optical transparency. Luxury consumer goods such as high-end loudspeakers, in specialty vehicles (e.g., sidewalls for motorhomes), in industrial processing (e.g., marble protection during cutting and transport), and in furniture.		https://doi.org/10.3390/ma14040714 http://dx.doi.org/10.1021/acssuschemeng.5b00209
2015	Carrot waste	Food Waste	MFC liberated (Enzymatic + homogenization) + Coating MFC with GripX + Wet spinning by adding Sodium Alginate (route 1a)	MFC	CNF/MFC	10	g	Lab	Lab	No	1.6	kg CO2eq	160	Food packaging because of its barrier properties, to medical applications or use in organic displays, thanks to its optical transparency. Luxury consumer goods such as high-end loudspeakers, in specialty vehicles (e.g., sidewalls for motorhomes), in industrial processing (e.g., marble protection during cutting and transport), and in furniture.		https://doi.org/10.3390/ma14040714 http://dx.doi.org/10.1021/acssuschemeng.5b00209
2015	Carrot waste	Food Waste	MFC liberated (Enzymatic + homogenization) + Wet spinning by adding Sodium Alginate (without coating) (route 1b)_x000D_	MFC	CNF/MFC	10	g	Lab	Lab	No	1.5	kg CO2eq	150	Food packaging because of its barrier properties, to medical applications or use in organic displays, thanks to its optical transparency. Luxury consumer goods such as high-end loudspeakers, in specialty vehicles (e.g., sidewalls for motorhomes), in industrial processing (e.g., marble protection during cutting and transport), and in furniture.		https://doi.org/10.3390/ma14040714 http://dx.doi.org/10.1021/acssuschemeng.5b00209
2015	Carrot waste	Food Waste	MFC liberated (Enzymatic + homogenization) + Wet spinning by adding Sodium Alginate (without coating) (route 1b)_x000D_	MFC	CNF/MFC	10	g	Lab	Lab	No	1.6	kg CO2eq	160	Food packaging because of its barrier properties, to medical applications or use in organic displays, thanks to its optical transparency. Luxury consumer goods such as high-end loudspeakers, in specialty vehicles (e.g., sidewalls for motorhomes), in industrial processing (e.g., marble protection during cutting and transport), and in furniture.		https://doi.org/10.3390/ma14040714 http://dx.doi.org/10.1021/acssuschemeng.5b00209
2015	Carrot waste	Food Waste	MFC liberated (Enzymatic + homogenization) + electrospinning by adding PEO as a carrier polymer (route 2)	MFC	CNF/MFC	10	g	Lab	Lab	No	1.5	kg CO2eq	150	Food packaging because of its barrier properties, to medical applications or use in organic displays, thanks to its optical transparency. Luxury consumer goods such as high-end loudspeakers, in specialty vehicles (e.g., sidewalls for motorhomes), in industrial processing (e.g., marble protection during cutting and transport), and in furniture.		https://doi.org/10.3390/ma14040714 http://dx.doi.org/10.1021/acssuschemeng.5b00209
2015	Carrot waste	Food Waste	MFC liberated (Enzymatic + homogenization) + electrospinning by adding PEO as a carrier polymer (route 2)	MFC	CNF/MFC	10	g	Lab	Lab	No	1.6	kg CO2eq	160	Food packaging because of its barrier properties, to medical applications or use in organic displays, thanks to its optical transparency. Luxury consumer goods such as high-end loudspeakers, in specialty vehicles (e.g., sidewalls for motorhomes), in industrial processing (e.g., marble protection during cutting and transport), and in furniture.		https://doi.org/10.3390/ma14040714 http://dx.doi.org/10.1021/acssuschemeng.5b00209
2017	Carrot waste	Food Waste	Bleaching, washing, Masuko grinding	CNF	CNF/MFC	1	kg of CNF water dispersion (2%), dry weight of 20 g CNF	Commercial	Commercial	No	0.0586	kg CO2eq	0.0586	Lightweight and resistant composite sandwich structures for use in vehicles, aeronautical applications and sporting goods	Includes use of Masuko grinder	http://www.incomproject.eu/flyers/LCA_brochure.pdf
2020	Wood waste pulp	Waste Wood Pulp	High-pressure homogenization	CNF	CNF/MFC	1	kg	Pilot	Pilot	Yes	1.2	kg CO2eq	1.2	Biomedical applications, packaging, wastewater treatment (WWT) membranes, and for removal of bacteria and metal ions.	GWP is expressed as per kilogram of nanomaterial (dry weight. The range covers a low-impact (unbleached sulfate pulp) and high-impact (chlorine-bleached sulfite pulp) scenario.	https://doi.org/10.1016/j.jclepro.2020.120274
2020	Wood waste pulp	Waste Wood Pulp	High-pressure homogenization	CNF	CNF/MFC	1	kg	Pilot	Pilot	Yes	2.4	kg CO2eq	2.4	Biomedical applications, packaging, wastewater treatment (WWT) membranes, and for removal of bacteria and metal ions.	GWP is expressed as per kilogram of nanomaterial (dry weight. The range covers a low-impact (unbleached sulfate pulp) and high-impact (chlorine-bleached sulfite pulp) scenario.	https://doi.org/10.1016/j.jclepro.2020.120274
2020	Wood waste pulp	Waste Wood Pulp	Enzymatic pretreatment + Microfluidization	CNF	CNF/MFC	1	kg	Pilot	Pilot	Yes	0.8	kg CO2eq	0.8	Biomedical applications, packaging, wastewater treatment (WWT) membranes, and for removal of bacteria and metal ions.	GWP is expressed as per kilogram of nanomaterial (dry weight. The range covers a low-impact (unbleached sulfate pulp) and high-impact (chlorine-bleached sulfite pulp) scenario.	https://doi.org/10.1016/j.jclepro.2020.120274
2020	Wood waste pulp	Waste Wood Pulp	Enzymatic pretreatment + Microfluidization	CNF	CNF/MFC	1	kg	Pilot	Pilot	Yes	1.6	kg CO2eq	1.6	Biomedical applications, packaging, wastewater treatment (WWT) membranes, and for removal of bacteria and metal ions.	GWP is expressed as per kilogram of nanomaterial (dry weight. The range covers a low-impact (unbleached sulfate pulp) and high-impact (chlorine-bleached sulfite pulp) scenario.	https://doi.org/10.1016/j.jclepro.2020.120274
2020	Wood waste pulp	Waste Wood Pulp	Carboxy-methylation pretreatment + Microfluidization	CNF	CNF/MFC	1	kg	Pilot	Pilot	Yes	99	kg CO2eq	99	Biomedical applications, packaging, wastewater treatment (WWT) membranes, and for removal of bacteria and metal ions.	GWP is expressed as per kilogram of nanomaterial (dry weight. The range covers a low-impact (unbleached sulfate pulp) and high-impact (chlorine-bleached sulfite pulp) scenario.	https://doi.org/10.1016/j.jclepro.2020.120274
2020	Wood waste pulp	Waste Wood Pulp	Carboxy-methylation pretreatment + Microfluidization	CNF	CNF/MFC	1	kg	Pilot	Pilot	Yes	110	kg CO2eq	110	Biomedical applications, packaging, wastewater treatment (WWT) membranes, and for removal of bacteria and metal ions.	GWP is expressed as per kilogram of nanomaterial (dry weight. The range covers a low-impact (unbleached sulfate pulp) and high-impact (chlorine-bleached sulfite pulp) scenario.	https://doi.org/10.1016/j.jclepro.2020.120274
2021	Hardwood kraft pulp	Primary Wood Pulp	Enzymatic Treatments & Homogenization (ENZHO)	CNF	CNF/MFC	10	grams	Lab	Lab	No	0.186	kg CO2 eq	18.6	At the laboratory level as additives or building blocks for different products, at the commercial level for personal care, coatings, construction additives and packaging, solvent free epoxy spray		https://doi.org/10.3390/molecules26092558
2022	Eucalyptus wood	Primary Wood	Refining alone	CNF	CNF/MFC	2	g dry CNF film	Lab	Lab	No	0.014	kg CO2eq	7	petroleum-based polymers such as polyethylene tere_x0002_phthalate (PET), polyethylene naphthalate (PEN) and polyimides (PIs)		https://doi.org/10.1016/j.jclepro.2022.130890
2022	Eucalyptus wood	Primary Wood	Refining and homogenization	CNF	CNF/MFC	2	g dry CNF film	Lab	Lab	No	0.025	kg CO2eq	12.5	petroleum-based polymers such as polyethylene tere_x0002_phthalate (PET), polyethylene naphthalate (PEN) and polyimides (PIs)		https://doi.org/10.1016/j.jclepro.2022.130890
2012	Coconut fibers	Food Waste	EUC extraction (hydrolysis)	CNC	CNC	1	g	Lab	Lab	No	1.08641	kg CO2eq	1086.41	Reinforcing the mechanical properties of different polymers		http://dx.doi.org/10.1016/j.jclepro.2012.05.033 https://doi.org/10.3390/ma14040714
2012	Cotton fibers	Food Waste	EC extraction (hydrolysis)	CNC	CNC	1	g	Lab	Lab	No	0.122171	kg CO2eq	122.171	Reinforcing the mechanical properties of different polymers		http://dx.doi.org/10.1016/j.jclepro.2012.05.033 https://doi.org/10.3390/ma14040714
2015	bleached kraft pulp from wood chips	Primary Wood Pulp	pilot acid hydrolysis process	CNC	CNC	1	kg	Pilot	Pilot	No	29.64	kg CO2eq	29.64	coatings, microelectronics, high-strength transparent plastic composites		https://www.fs.usda.gov/research/treesearch/50827
2016	Coconut fibers	Food Waste	Extraction of CNC with high powered ultrasound (CNU)	CNC	CNC	1	g	Lab	Lab	No	0.207	kg CO2eq	207	Enzymatic immobilization, controlled release of quimioterapics, and reinforcement agent for films and nanocomposites		https://doi.org/10.3390/ma14040714 https://doi.org/10.1016/j.indcrop.2016.02.063
2022	Cotton pulp	Primary Cotton Pulp	Sulphuric acid hydrolysis without acid separation	CNC	CNC	1	kg	Pilot	Pilot	No	49.4	kg CO2eq	49.4	Medicine, electronics, construction, food, coatings, cosmetics		https://doi.org/10.1016/j.jclepro.2022.131073
2022	Cotton pulp	Primary Cotton Pulp	Sulphuric acid hydrolysis + gravity settling with acid separation	CNC	CNC	1	kg	Pilot	Pilot	No	40.35	kg CO2eq	40.35	Medicine, electronics, construction, food, coatings, cosmetics		https://doi.org/10.1016/j.jclepro.2022.131073
2022	Cotton pulp	Primary Cotton Pulp	Sulphuric acid hydrolysis + centrifugation with acid separation	CNC	CNC	1	kg	Pilot	Pilot	No	40.87	kg CO2eq	40.87	Medicine, electronics, construction, food, coatings, cosmetics		https://doi.org/10.1016/j.jclepro.2022.131073
2022	Cotton pulp	Primary Cotton Pulp	Sulphuric acid hydrolysis + microfiltration with acid separation	CNC	CNC	1	kg	Pilot	Pilot	No	29.6	kg CO2eq	29.6	Medicine, electronics, construction, food, coatings, cosmetics		https://doi.org/10.1016/j.jclepro.2022.131073
2023	Wood pulp	Food Waste	Acid hydrolysis with acid recovery	CNC	CNC	1	kg	Commercial	Commercial	No	11.39	kg CO2eq	11.39	Additives and composite materials	Paper is based on process model. "Very few studies have focused on the economic and environmental impacts of CNC production"	https://doi.org/10.1016/j.biortech.2023.128955
2023	Wood pulp	Food Waste	Acid hydrolysis without acid recovery	CNC	CNC	1	kg	Commercial	Commercial	No	11.18	kg CO2eq	11.18	Additives and composite materials	Paper is based on process model. "Very few studies have focused on the economic and environmental impacts of CNC production"	https://doi.org/10.1016/j.biortech.2023.128955

## Sheet: Supp_Table3
Supplementary Table 3. Total lifecycle climate change impacts for each material in each scenario (in kg CO2 eq. /kg).
Climate Change Impacts for Selected Materials (in kg CO2 eq./kg)
Lignin	CNF/MFC	PLA	PET	HDPE	LDPE	PP	PU	PA
-2.06167	2.828	4.94634	5.05975	0.67721	2.08408	2.46169	7.57505	11.6263
-1.62567	4.728	5.03369	5.25307	0.67919	2.43393	2.04884	5.23311	11.6503
-1.52167	2.628	3.11301	2.45412	0.68808	2.45459	2.45099	5.27484	11.6592
-1.17167	3.428	3.20036	3.73492	0.68808	2.67685	4.84649	5.22994	9.43351
-0.90167	2.378	4.92801	5.22192	0.69006	2.70168	4.43364	7.79815	9.2862
-0.34292	2.628	5.01536	5.08176	0.69006	2.11322	4.83579	5.12752	9.39179
-0.15167	2.418	3.09467	3.36412	0.69439	4.90851	4.85153	5.12794	9.28662
0.09308	2.828	3.18203	3.21856	0.70525	5.25836	4.43869	7.82683	9.39179
0.19708	1.6866	4.48801	3.13397	0.70525	5.27903	4.84084	5.23311	11.6548
0.20708	1.2	4.57536	2.45412	0.74655	5.50129	2.40566	7.51107	11.6788
0.23	3.1	2.65467	3.21856	0.75742	5.52611	1.99282	5.16914	11.6878
0.23	1	2.74203	3.73492	0.75742	4.93766	2.39497	5.21086	9.46209
0.54708	1.8	3.11301	3.273	0.77792	2.03191	2.4169	5.16596	9.31477
0.64308	0.75	3.20036	3.64968	0.7799	2.38176	2.00405	7.73417	9.42037
0.666	1	1.27967	3.36412	0.79332	2.40243	2.4062	5.06354	9.31519
0.666	0.79	1.36703	2.44326	0.79509	2.62469	4.95942	5.06397	9.42036
0.74708	1.2	13.363	3.08392	0.7953	2.64951	4.54658	7.76285	11.7185
0.77	0.0586	13.4504	2.48791	0.81049	2.06106	4.94873	5.16913	11.7425
0.77	2.81172	11.5297	3.09533	0.84726	2.01672	4.82863		11.7514
0.81708	4.71172	11.617	2.49877	0.8625	2.36657	4.41579		9.52573
1.09708	2.61172	13.3447	2.49877	0.8625	2.38723	4.81794		9.37842
1.12	3.41172	13.432	4.85759	0.86266	2.60949	2.40372		9.48401
1.12	2.36172	11.5113	5.0262	0.86448	2.63432	1.99088		9.37884
1.36708	2.61172	11.5987	3.09533	0.86448	2.04586	2.39303		9.48401
1.39	2.40172	12.9047	4.95799	0.87968	4.88239			11.631
1.39	2.81172	12.992	5.29853	0.87968	5.23224			11.655
1.56708	1.67032	11.0713	5.06519	0.88444	5.25291			11.6639
1.94875	1.18372	11.1587	5.25851	0.88444	5.47517			9.43826
2.11708	3.08372	11.5297	2.45956	0.88642	5.49999			9.29094
2.14	0.98372	11.617	3.74036	0.88642	4.91154			9.39654
2.14	1.78372	9.69634	5.22736	0.90161	2.01474			9.29136
2.38475	0.73372	9.78369	5.0872	0.90161	2.36459			9.39653
2.48875	0.98372		3.36956	0.93184	2.38525			10.5991
2.49875	0.77372		3.224	0.93184	2.60751			10.6231
2.52167	1.18372		3.13942	0.95378	2.63234			10.632
2.83875	0.04232		2.45956	0.95378	2.04388			8.40637
2.93475	2.421		3.224	0.95624	5.01893			8.25906
2.95767	4.321		3.74036	0.95822	5.36878			8.36465
3.03875	2.221		3.27844	0.97342	5.38944			8.25948
3.06167	3.021		3.65512	1.02558	5.6117			8.36465
3.10875	1.971		3.36956	1.04148	5.63652			10.5706
3.38875	2.221		2.4487	1.04148	5.04807			10.5946
3.41167	2.011		3.08936	1.04346	4.91444			10.6035
3.65875	2.421		2.49335	1.04346	5.26428			8.3778
3.68167	1.2796		3.10077	1.05865	5.28495			8.23049
3.85875	0.793		2.50421	1.05865	5.50721			8.33608
4.40875	2.693		2.50421	1.11082	5.53203			8.23091
4.43167	0.593		4.86304	1.11082	4.94358			8.33607
8.45917	1.393		5.03165	2.02802				10.6619
8.89517	0.343		3.10077	2.03				10.6859
8.99917	0.593		4.96343	2.0452				10.6948
9.34917	0.383		5.30397	2.09736				8.46917
9.61917	0.793		3.09481	2.44541				8.32186
10.1779	-0.3484		3.28813	2.44739				8.42745
10.3692	1.2		0.48919	2.4532				8.32228
10.6139	3.1		1.76998	2.45518				8.42745
10.7179	1		3.25698	2.46259				10.5745
10.7279	1.8		3.11682	2.47037				10.5984
10.7508	0.75		1.39918	2.51475				10.6074
10.7508	1		1.25362	2.52254				8.3817
11.0679	0.79		1.16904	3.54487				8.23438
11.1639	1.2		0.48919	3.55573				8.33998
11.1868	0.0586		1.25362	3.55573				8.2348
11.1868	-0.428		1.76998	3.57099				8.33997
11.2679	1.472		1.30806	3.57691
11.2908	-0.628		1.68474	3.58185
11.2908	0.172		1.39918	3.58185
11.3379	-0.878		0.47832	3.58777
11.6179	-0.628		1.11899	3.58777
11.6408	-0.838		0.52297	3.64557
11.6408	-0.428		1.13039	3.66097
11.8879	-1.5694		0.53384	3.67169
11.9108	10.302		0.53384	3.67761
11.9108	12.202		2.89266	3.6814
12.0879	10.102		3.06127	3.68709
12.4696	10.902		1.13039	3.69226
12.6379	9.852		2.99305	3.69226
12.6608	10.102		3.33359	3.69301
12.6608	9.892		5.02729	3.73016
12.9056	10.302		5.22061	3.73016
13.0096	9.1606		2.42167	3.75209
13.0196	8.674		3.70246	3.75209
13.0425	10.574		5.18947	3.75628
13.3596	8.474		5.04931	3.75628
13.4556	9.274		3.33166	3.7622
13.4785	8.224		3.1861	3.7622
13.5596	8.474		3.10152	3.77821
13.5825	8.264		2.42167	3.77821
13.6296	8.674		3.1861	3.78211
13.9096	7.5326		3.70246	3.78413
13.9325	10.2857		3.24054	3.78413
14.1796	12.1857		3.61722	3.7975
14.2025	10.0857		3.33166	3.8239
14.3796	10.8857		2.4108	3.85002
14.9296	9.83572		3.05147	3.85594
14.9525	10.0857		2.45545	3.86669
	9.87572		3.06288	3.86669
	10.2857		2.46632	3.88862
	9.14432		2.46632	3.88862
	8.65772		4.82514	3.90913
	10.5577		4.99375	3.90913
	8.45772		3.06288	3.93525
	9.25772		4.92553	3.93525
	8.20772		5.26608	3.94118
	8.45772		3.13152	3.94118
	8.24772		3.32484	3.96043
	8.65772		0.52589	4.04567
	7.51632		1.80669	4.04567
	9.895		3.29369	4.89568
	11.795		3.15353	4.9218
	9.695		1.43589	4.92772
	10.495		1.29033	5.03221
	9.445		1.20575	5.31307
	9.695		0.52589	5.32085
	9.485		1.29033	5.33919
	9.895		1.80669	5.34511
	8.7536		1.34477	5.34697
	8.267		1.72145	5.35289
	10.167		1.43589	5.4496
	8.067		0.51503	5.45739
	8.867		1.1557
	7.817		0.55968
	8.067		1.1671
	7.857		0.57055
	8.267		0.57055
	7.1256		2.92937
	8.674		3.09798
	10.574		1.1671
	8.474		3.02976
	9.274		3.3703
	8.224		3.08908
	8.474		3.28241
	8.264		0.48346
	8.674		1.76425
	7.5326		3.25126
	7.046		3.1111
	8.946		1.39345
	6.846		1.24789
	7.646		1.16331
	6.596		0.48346
	6.846		1.24789
	6.636		1.76425
	7.046		1.30233
	5.9046		1.67902
			1.39345
			0.4726
			1.11326
			0.51725
			1.12467
			0.52811
			0.52811
			2.88693
			3.05554
			1.12467
			2.98732
			3.32787
			5.14913
			5.34245
			2.54351
			3.8243
			5.31131
			5.17115
			3.4535
			3.30794
			3.22336
			2.54351
			3.30794
			3.8243
			3.36238
			3.73907
			3.4535
			2.53264
			3.17331
			2.57729
			3.18472
			2.58816
			2.58816
			4.94698
			5.11559
			3.18472
			5.04737
			5.38792
			3.08673
			3.28005
			0.4811
			1.7619
			3.2489
			3.10874
			1.3911
			1.24554
			1.16095
			0.4811
			1.24554
			1.7619
			1.29997
			1.67666
			1.3911
			0.47024
			1.1109
			0.51489
			1.12231
			0.52575
			0.52575
			2.88457
			3.05318
			1.12231
			2.98497
			3.32551
			3.32512
			3.51844
			0.71949
			2.00029
			3.48729
			3.34713
			1.62949
			1.48393
			1.39934
			0.71949
			1.48393
			2.00029
			1.53836
			1.91505
			1.62949
			0.70863
			1.34929
			0.75328
			1.3607
			0.76414
			0.76414
			3.12296
			3.29157
			1.3607
			3.22336
			3.5639
			3.23669
			3.43001
			0.63106
			1.91186
			3.39886
			3.2587
			1.54106
			1.3955
			1.31092
			0.63106
			1.3955
			1.91186
			1.44994
			1.82662
			1.54106
			0.6202
			1.26086
			0.66485
			1.27227
			0.67571
			0.67571
			3.03454
			3.20315
			1.27227
			3.13493
			3.47547
			3.33401
			3.52733
			0.72838
			2.00918
			3.49618
			3.35602
			1.63838
			1.49282
			1.40824
			0.72838
			1.49282
			2.00918
			1.54726
			1.92394
			1.63838
			0.71752
			1.35818
			0.76217
			1.36959
			0.77304
			0.77304
			3.13186
			3.30047
			1.36959
			3.23225
			3.57279
			3.31171
			3.50503
			0.70609
			1.98688
			3.47389
			3.33372
			1.61608
			1.47052
			1.38594
			0.70609
			1.47052
			1.98688
			1.52496
			1.90164
			1.61608
			0.69522
			1.33589
			0.73987
			1.3473
			0.75074
			0.75074
			3.10956
			3.27817
			1.3473
			3.20995
			3.5505
			3.31313
			3.50645
			0.7075
			1.9883
			3.4753
			3.33514
			1.6175
			1.47194
			1.38736
			0.7075
			1.47194
			1.9883
			1.52638
			1.90306
			1.6175
			0.69664
			1.33731
			0.74129
			1.34871
			0.75216
			0.75216
			3.11098
			3.27959
			1.34871
			3.21137
			3.55191
			3.29733
			3.49065
			0.69171
			1.9725
			3.45951
			3.31935
			1.6017
			1.45614
			1.37156
			0.69171
			1.45614
			1.9725
			1.51058
			1.88727
			1.6017
			0.68084
			1.32151
			0.72549
			1.33292
			0.73636
			0.73636
			3.09518
			3.26379
			1.33292
			3.19557
			3.53612
			3.42536
			3.61868
			0.81974
			2.10053
			3.58754
			3.44738
			1.72973
			1.58417
			1.49959
			0.81974
			1.58417
			2.10053
			1.63861
			2.0153
			1.72973
			0.80887
			1.44954
			0.85352
			1.46095
			0.86439
			0.86439
			3.22321
			3.39182
			1.46095
			3.3236
			3.66415
			3.38008
			3.5734
			0.77445
			2.05525
			3.54225
			3.40209
			1.68445
			1.53889
			1.45431
			0.77445
			1.53889
			2.05525
			1.59333
			1.97001
			1.68445
			0.76359
			1.40426
			0.80824
			1.41566
			0.81911
			0.81911
			3.17793
			3.34654
			1.41566
			3.27832
			3.61886
